# Supplementary material for: Simultaneous determination of hydroquinone and catechol by a reduced graphene oxide–polydopamine–carboxylated multi-walled carbon nanotube nanocomposite
Source: Royal Society of Chemistry journal article supplement (doi:10.1039/d1ra06032e), 2021-01-01
Supplement: d1ra06032e1.pdf [file d1ra06032e1.pdf]

Electronic Supplementary Information

**Simultaneous determination of hydroquinone and catechol by reduced graphene oxide-polydopamine-carboxylated multi-walled carbon nanotube nanocomposite**

Fengxia Chang,\* Hongyue Wang, Shuai He, Yu Gu, Wenjie Zhu, Tanwei Li, and Runhui Ma

College of Chemistry and Environment, Southwest Minzu University, Chengdu 610041, China. E-mail: changfengx@swun.edu.cn; Tel: +86-028-85928021.

**Table S1.** The peak potential difference  $\Delta E_{pa}$  and average peak oxidation current of HQ and CT at different electrodes

| Electrode          | $\Delta E_{pa}$ (mV) | $I_{pa}$ ( $\mu$ A) |       | RSD(%) (n=4) |      |
|--------------------|----------------------|---------------------|-------|--------------|------|
|                    |                      | HQ                  | CT    | HQ           | CT   |
| GCE                | -                    | 18.66               |       | 0.52         |      |
| GO/GCE             | 105                  | 8.833               | 13.54 | 0.38         | 0.35 |
| RGO-PDA/GCE        | 105                  | 40.33               | 49.00 | 0.34         | 0.41 |
| cMWCNTs/GCE        | 107                  | 58.59               | 63.81 | 0.16         | 0.18 |
| RGO-PDA-cMWCNT/GCE | 115                  | 102.8               | 117.2 | 0.23         | 0.24 |

**Table S2.** Fitted parameters of ohmic resistance ( $R_s$ ) and charge transfer resistance ( $R_{ct}$ ) of different electrodes

| Electrode          | $R_s$ ( $\Omega$ ) | $R_{ct}$ ( $\Omega$ ) |
|--------------------|--------------------|-----------------------|
| GCE                | 31.8               | 165                   |
| GO/GCE             | 37.6               | 5300                  |
| PDA/GCE            | 37.7               | 3500                  |
| RGO-PDA /GCE       | 35.2               | 220                   |
| RGO-PDA-cMWCNT/GCE | 35.6               | 196                   |

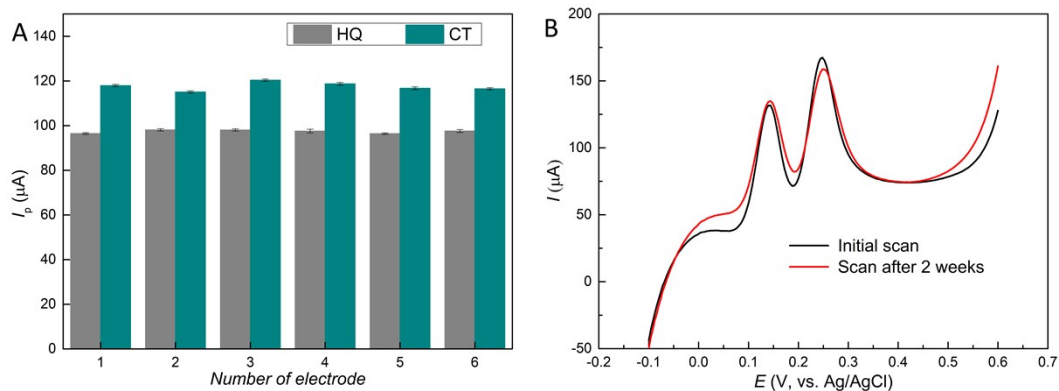

**Fig. S1** (A) The peak currents of HQ and CT (each 0.500 mM) obtained by DPV using 6 RGO-PDA-cMWCNT/GCE prepared in parallel. (B) The DPV results of HQ and CT (each 0.500 mM) with the newly prepared RGO-PDA-cMWCNT/GCE and the same electrode kept for two weeks. The supporting electrolyte is 0.1 M PBS (pH 7.0).

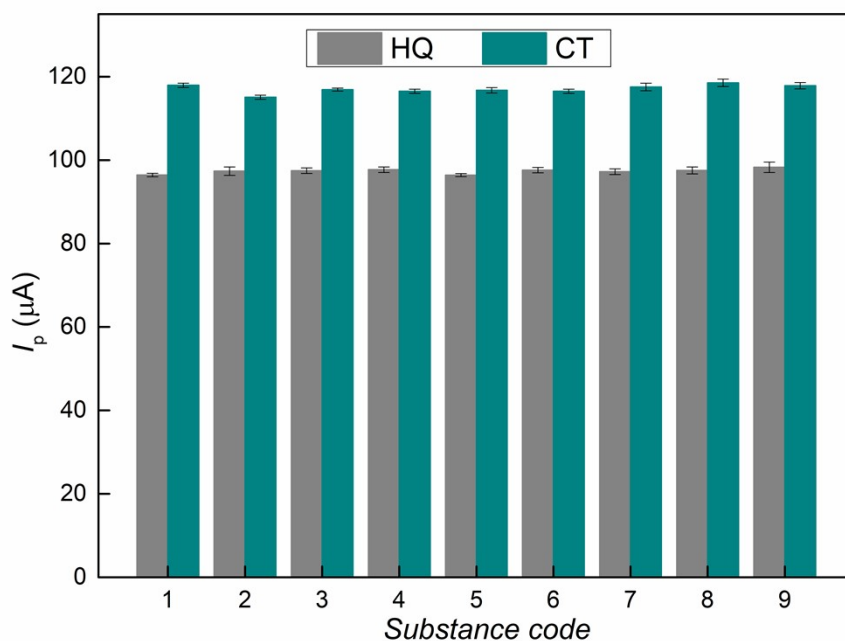

**Fig. S2** The peak currents of HQ and CT (each 0.500 mM) obtained by DPV with 20-fold  $\text{Na}^+$  (1),  $\text{Mg}^{2+}$  (2),  $\text{Ca}^{2+}$  (3),  $\text{Cu}^{2+}$  (4),  $\text{Zn}^{2+}$  (5),  $\text{SO}_4^{2-}$  (6),  $\text{NO}_3^-$  (7) and 10-fold phenol (8), resorcinol (9). The supporting electrolyte is 0.1 M PBS (pH 7.0).

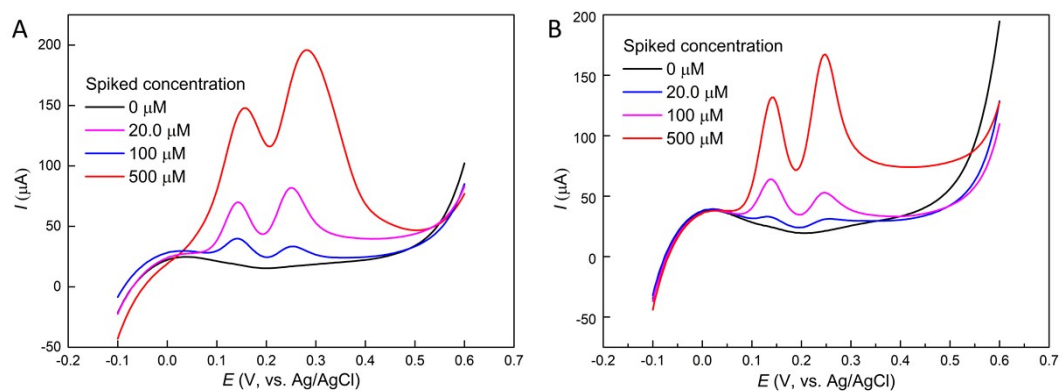

**Fig. S3** The DPV results of tap water (A) and lake water (B) with and without spiked HQ and CT. The supporting electrolyte is 0.1 M PBS (pH 7.0).
